# Supplementary material for: Artificial intelligence system for enhanced automated 1,3-propanediol green biosynthesis
Source: Royal Society of Chemistry journal article supplement (doi:10.1039/d3gc01586f), 2023-01-01
Supplement: d3gc01586f1.pdf [file d3gc01586f1.pdf]

## **Artificial Intelligence System for Enhanced Automated 1,3- propanediol Green Biosynthesis**

Jiacheng Huang<sup>1#</sup>, Chade-Deng Li<sup>1,2#</sup>, Haodong Zhao<sup>1,2</sup>, Meng Yu<sup>1</sup>, Aihui Zhang<sup>1,3\*</sup>,  
Baishan Fang<sup>1,2,3\*</sup>

Affiliations:

1. Department of Chemical and Biochemical Engineering, College of Chemistry and Chemical Engineering, Xiamen University, Xiamen, 361005, China
2. Gulei Innovation Institute, Xiamen University, Zhangzhou, 363200, China
3. Shenzhen Research Institute of Xiamen University, Shenzhen, 518000, China

# These authors contributed equally to this work

\*Corresponding authors: Tel: +86 0592 2185869

E-mail: zhangaihui@xmu.edu.cn (Aihui Zhang); fbs@xmu.edu.cn (Baishan Fang)

### ***Table of Contents for Supporting Information***

|                       |           |
|-----------------------|-----------|
| 1. Supporting Figures |           |
| .....                 | <b>02</b> |
| 2. Supporting Tables  |           |
| .....                 | <b>10</b> |
| 3. References.....    |           |
| .....                 | <b>16</b> |

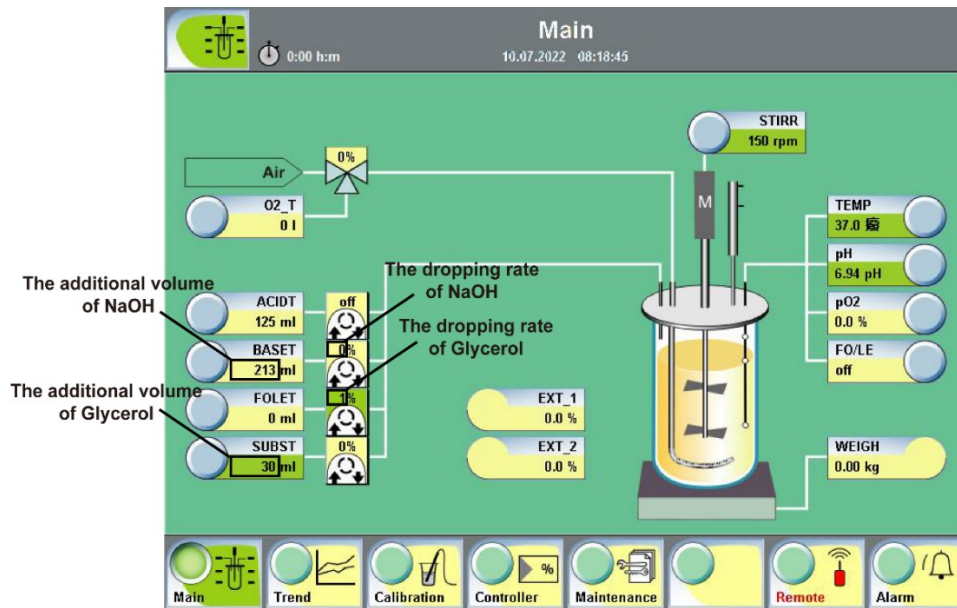

Figure S1. The real-time data of the flowmeter and speedometer for the base and feed are in the Sartorius bioreactor's supporting software.

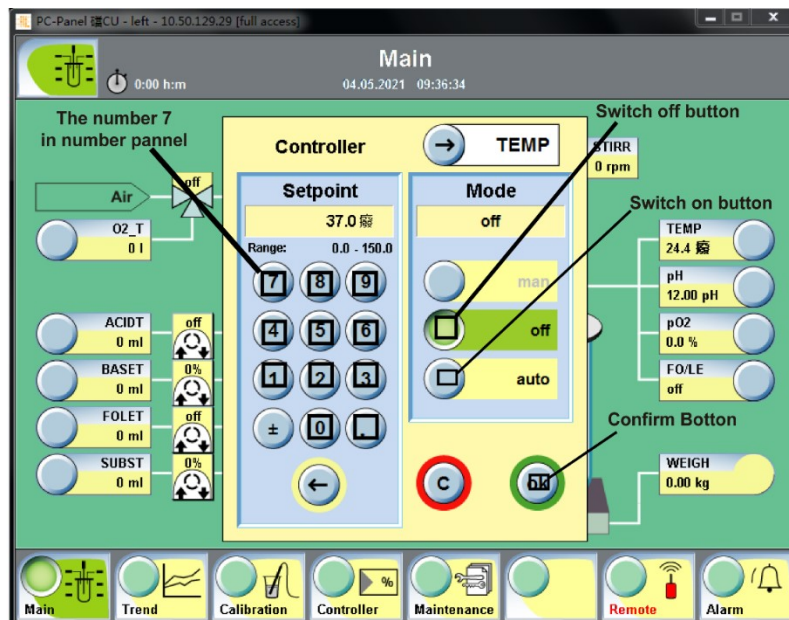

Figure S2. The number panel, on-off switch, and confirm button are in the Sartorius bioreactor's supporting software.

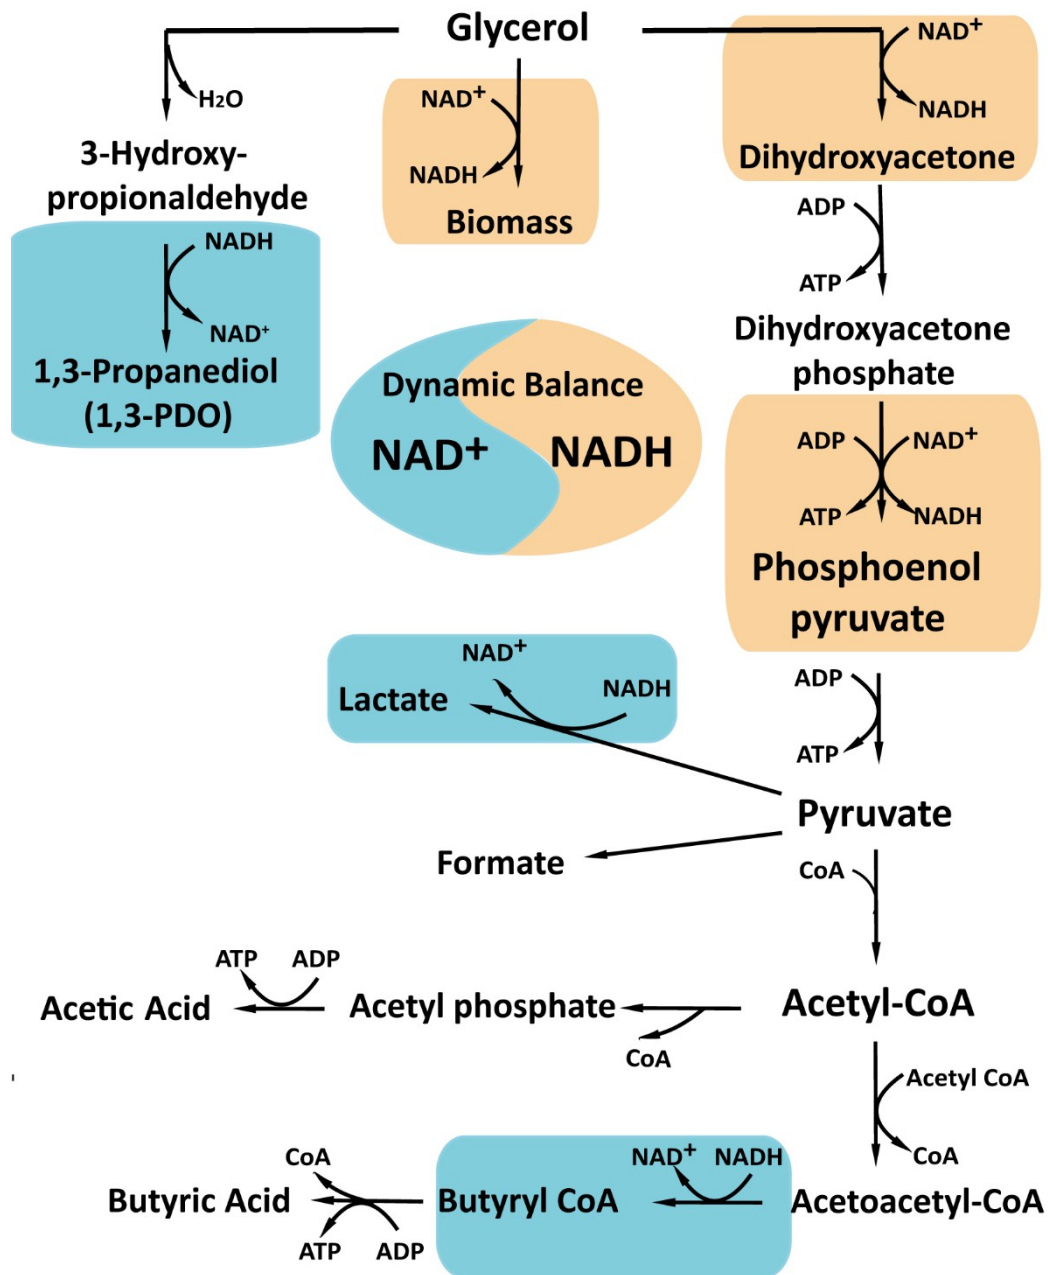

Figure S3. Schematic diagram of the main metabolic pathways closely associated with 1,3-PDO biosynthesis of *Clostridium butyricum* fed-batch fermentation process. The light blue part represents the pathway which would consume NADH, while the light red part represents the pathway which would generate NADH.

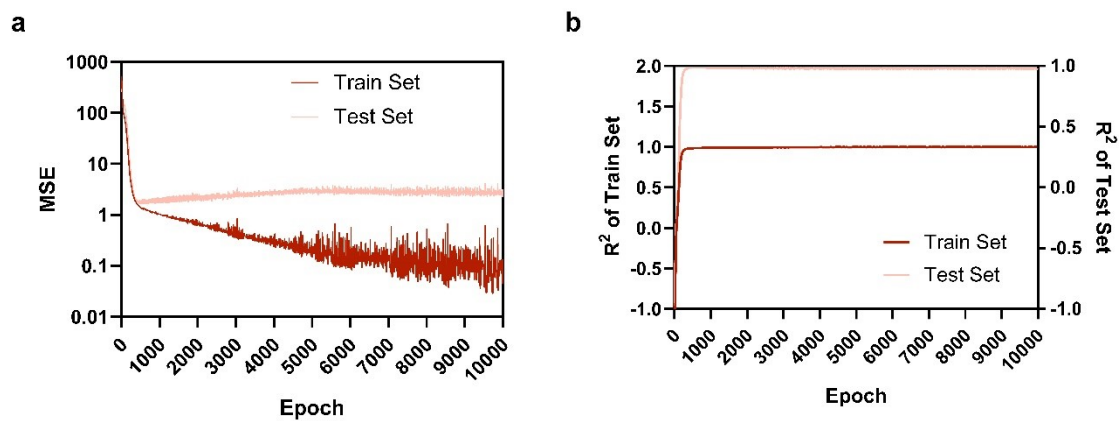

Figure S4. Training process of the soft sensor with best hyperparameters (4 layers with 80 nodes in each layer). The full process is monitored with two metrics, MSE (a) and  $R^2$  (b).

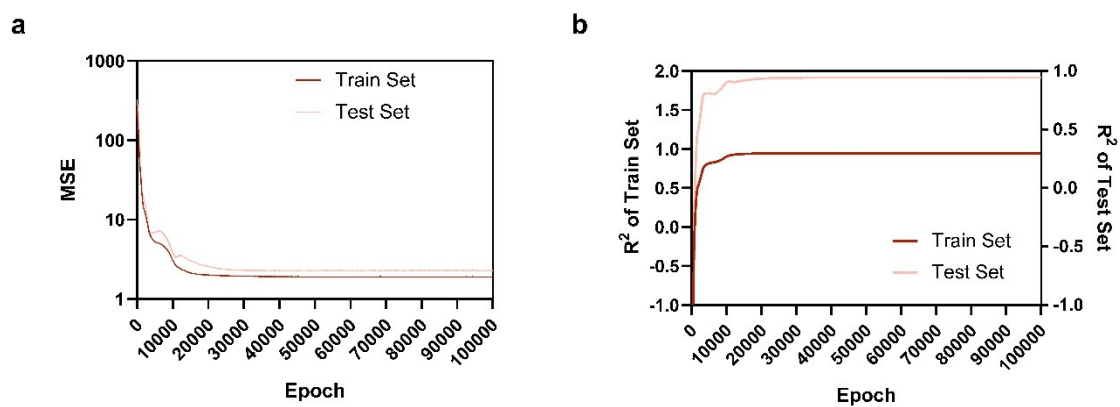

Figure S5. Training process of the predictor with best hyperparameters (8 hidden layers with 60 nodes in each layer). The full process is monitored with two metrics, MSE (a) and  $R^2$  (b).

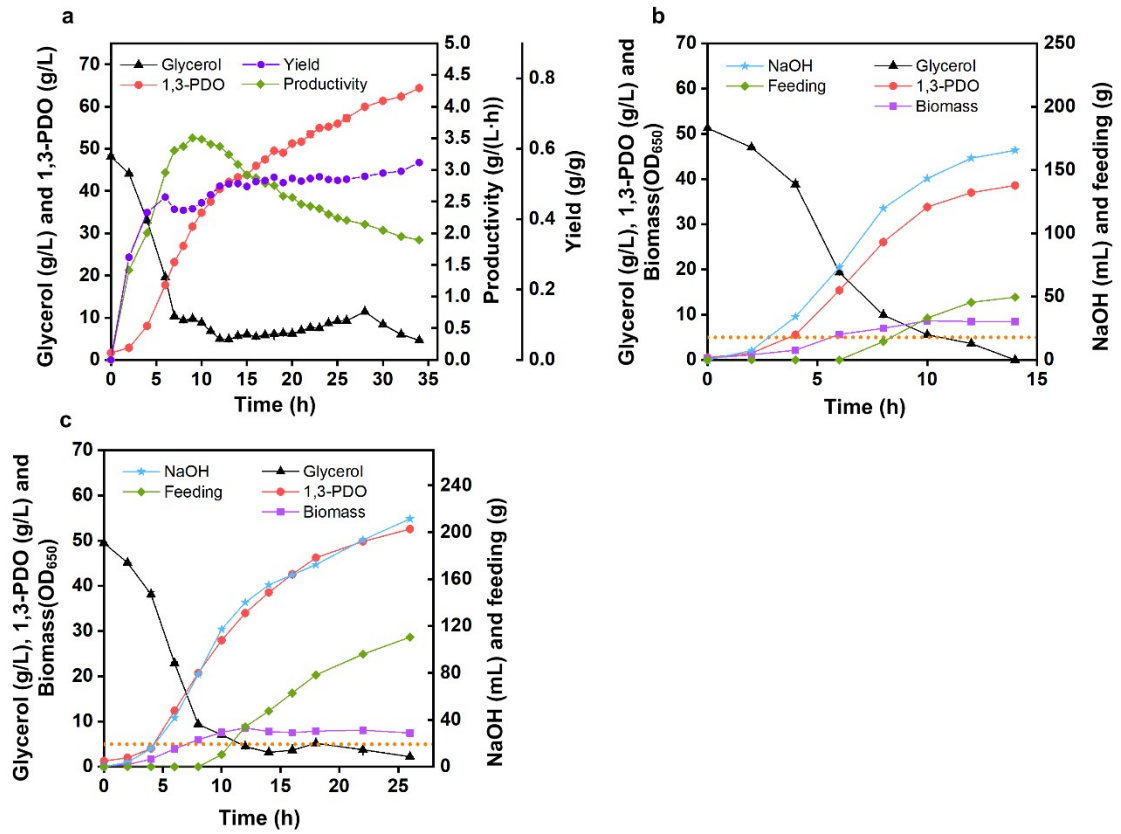

Figure S6. Time course of 1,3-PDO AI fed-batch fermentation. The relationship among 1,3-PDO concentrations, yield, and productivity (a). The concentrations of glycerol, 1,3-PDO (g/L), biomass (OD<sub>650</sub>), feeding (g), and NaOH (mL) in the AI fed-batch fermentations in which the threshold of NaOH dropping rate was set to 5 (b), 10 (c) mL/h.

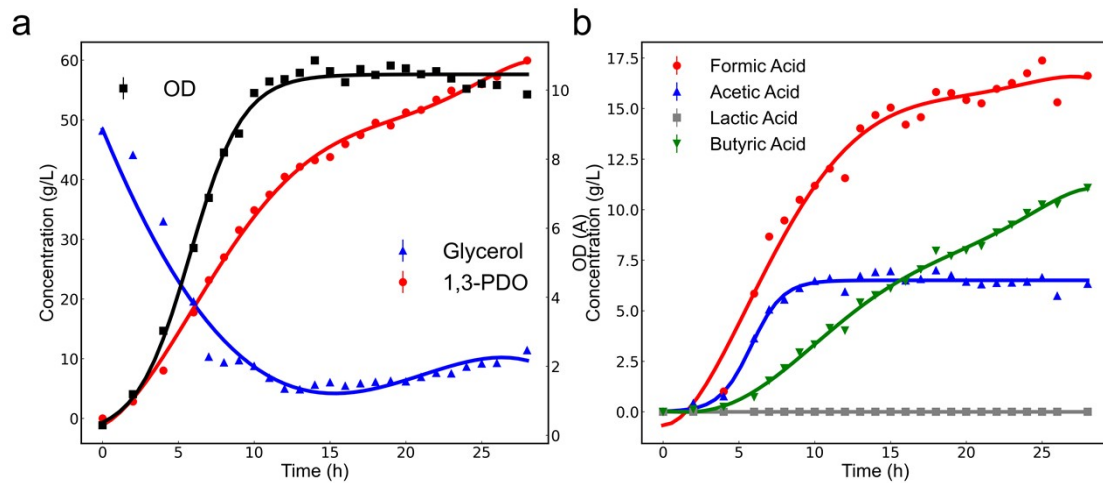

Figure S7. Curve fitting of the time course in 1,3-PDO fed-batch fermentation of G1. **(a)**: the scale in the left vertical ordinate for the concentrations (g/L) of glycerol and 1,3-PDO, while the scale in the right vertical ordinate for the OD (A) of *C. butyricum*; **(b)**: the scale in the left vertical ordinate for the concentrations (g/L) of formic acid, acetic acid, lactic acid, and butyric acid.

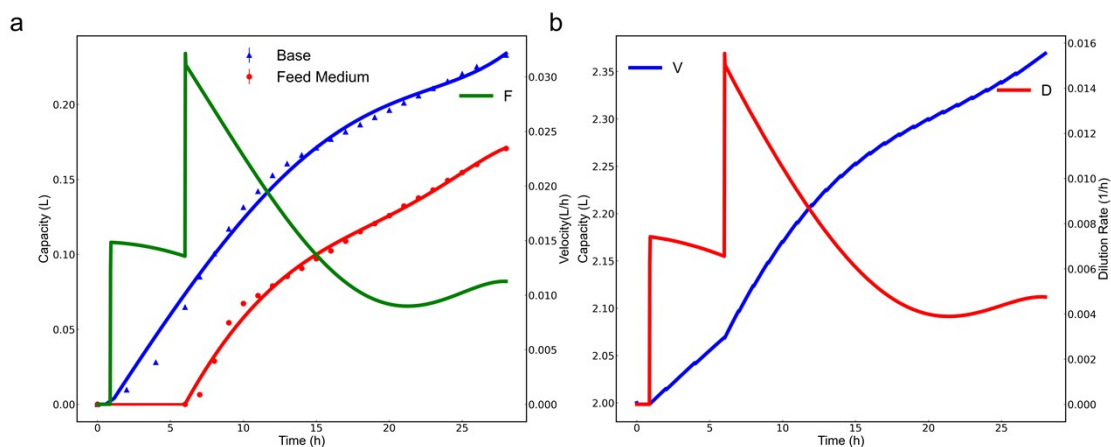

Figure S8. Curve fitting of the time course in 1,3-PDO fed-batch fermentation of G1. **(a)**: the scale in the left vertical ordinate for the volume (L) of adding base and feed medium, while the scale in the right vertical ordinate for their total flow rate (L/h); **(b)**: the scale in the left vertical ordinate for the volume (L) of the bioreactor, while the scale in the right vertical ordinate for dilution rate (1/h).

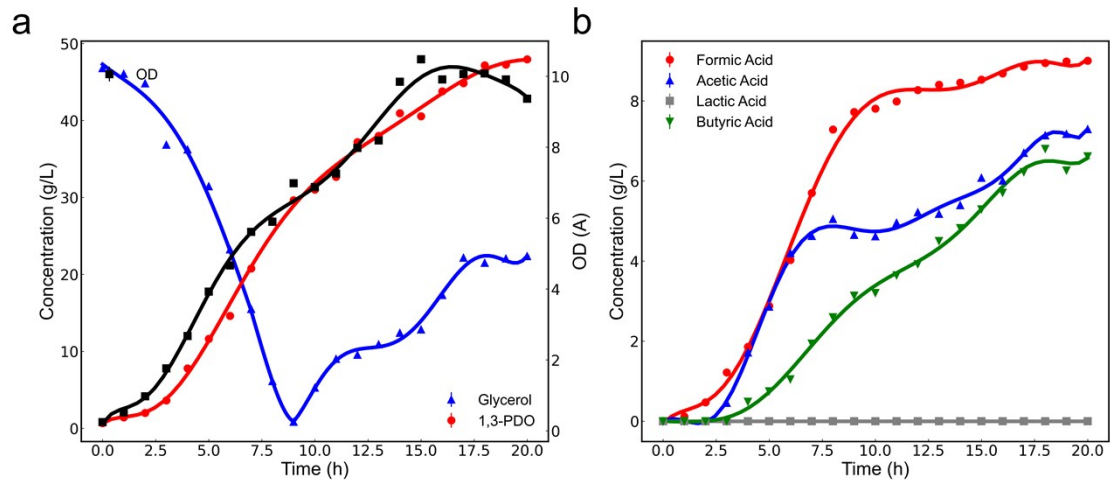

Figure S9. Curve fitting of the time course in 1,3-PDO fed-batch fermentation of G4. **(a)**: the scale in the left vertical ordinate for the concentrations (g/L) of glycerol and 1,3-PDO, while the scale in the right vertical ordinate for the OD (A) of *C. butyricum*; **(b)**: the scale in the left vertical ordinate for the concentrations (g/L) of formic acid, acetic acid, lactic acid, and butyric acid.

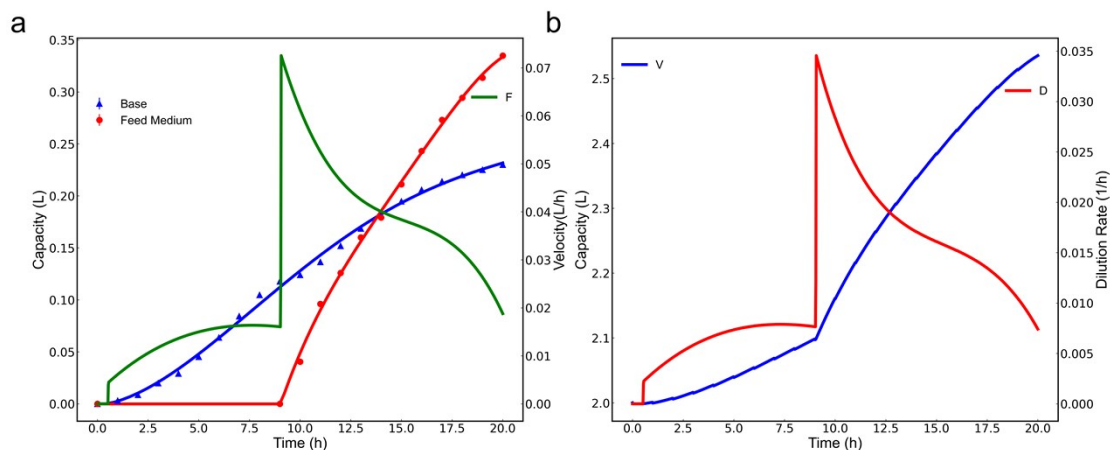

Figure S10. Curve fitting of the time course in 1,3-PDO fed-batch fermentation of G4. **(a)**: the scale in the left vertical ordinate for the volume (L) of adding base and feed medium, while the scale in the right vertical ordinate for their total flow rate (L/h); **(b)**: the scale in the left vertical ordinate for the volume (L) of the bioreactor, while the scale in the right vertical ordinate for dilution rate (1/h).

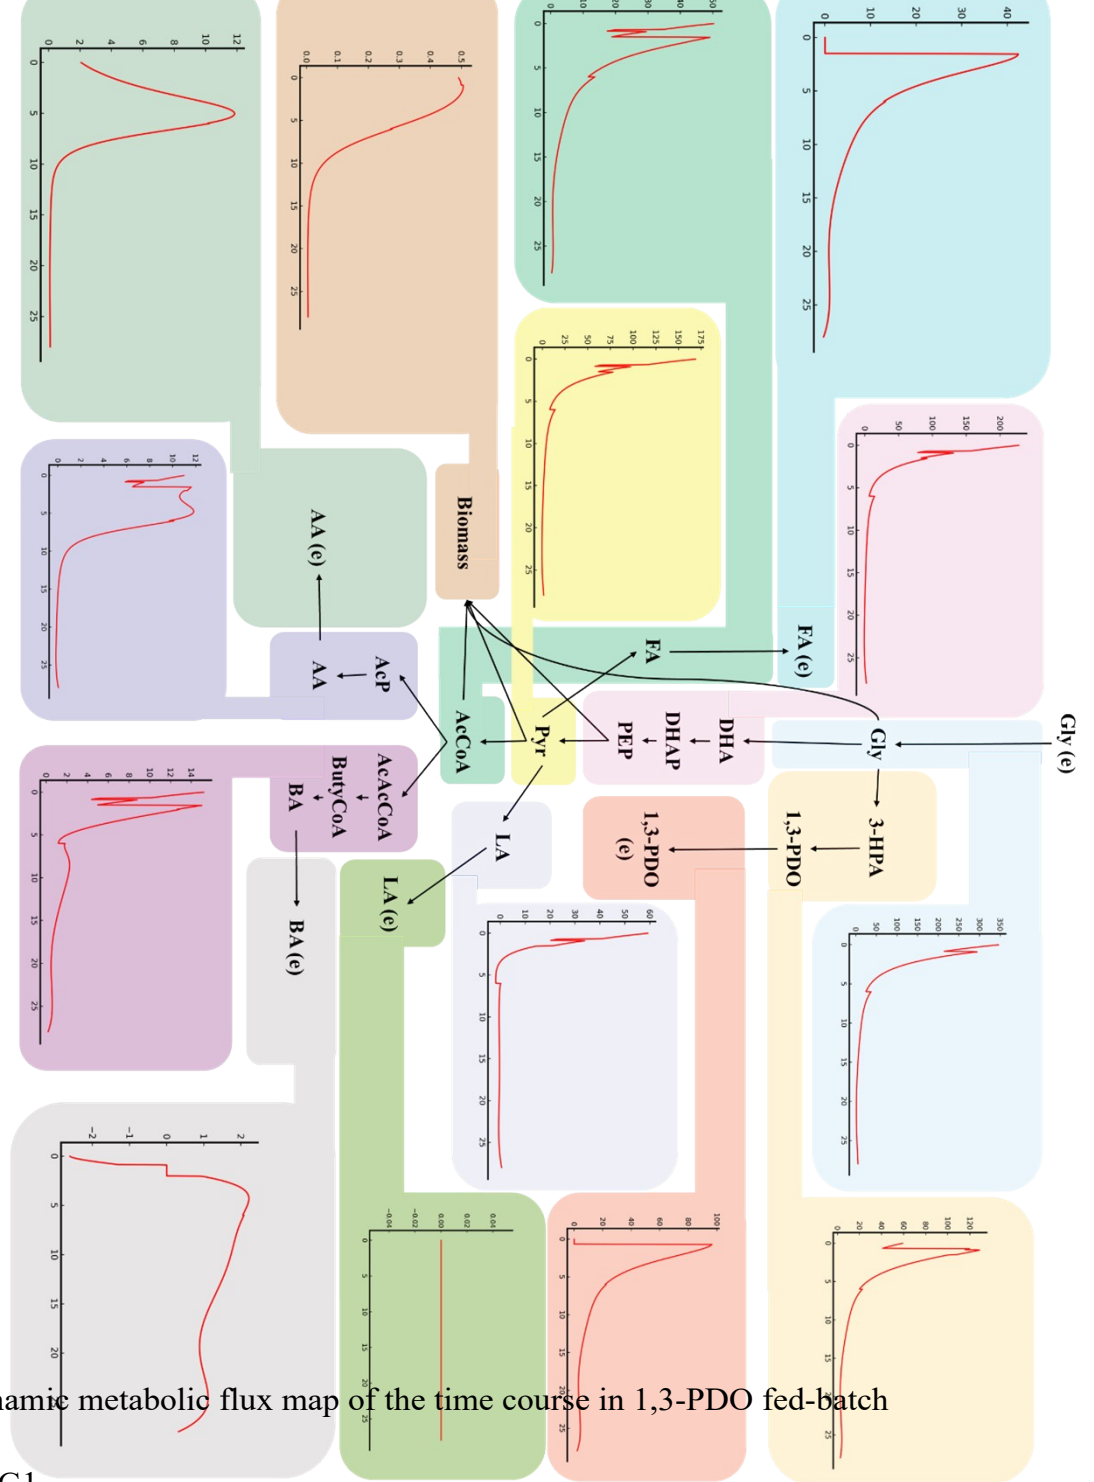

Figure S11. Dynamic metabolic flux map of the time course in 1,3-PDO fed-batch fermentation of G1.



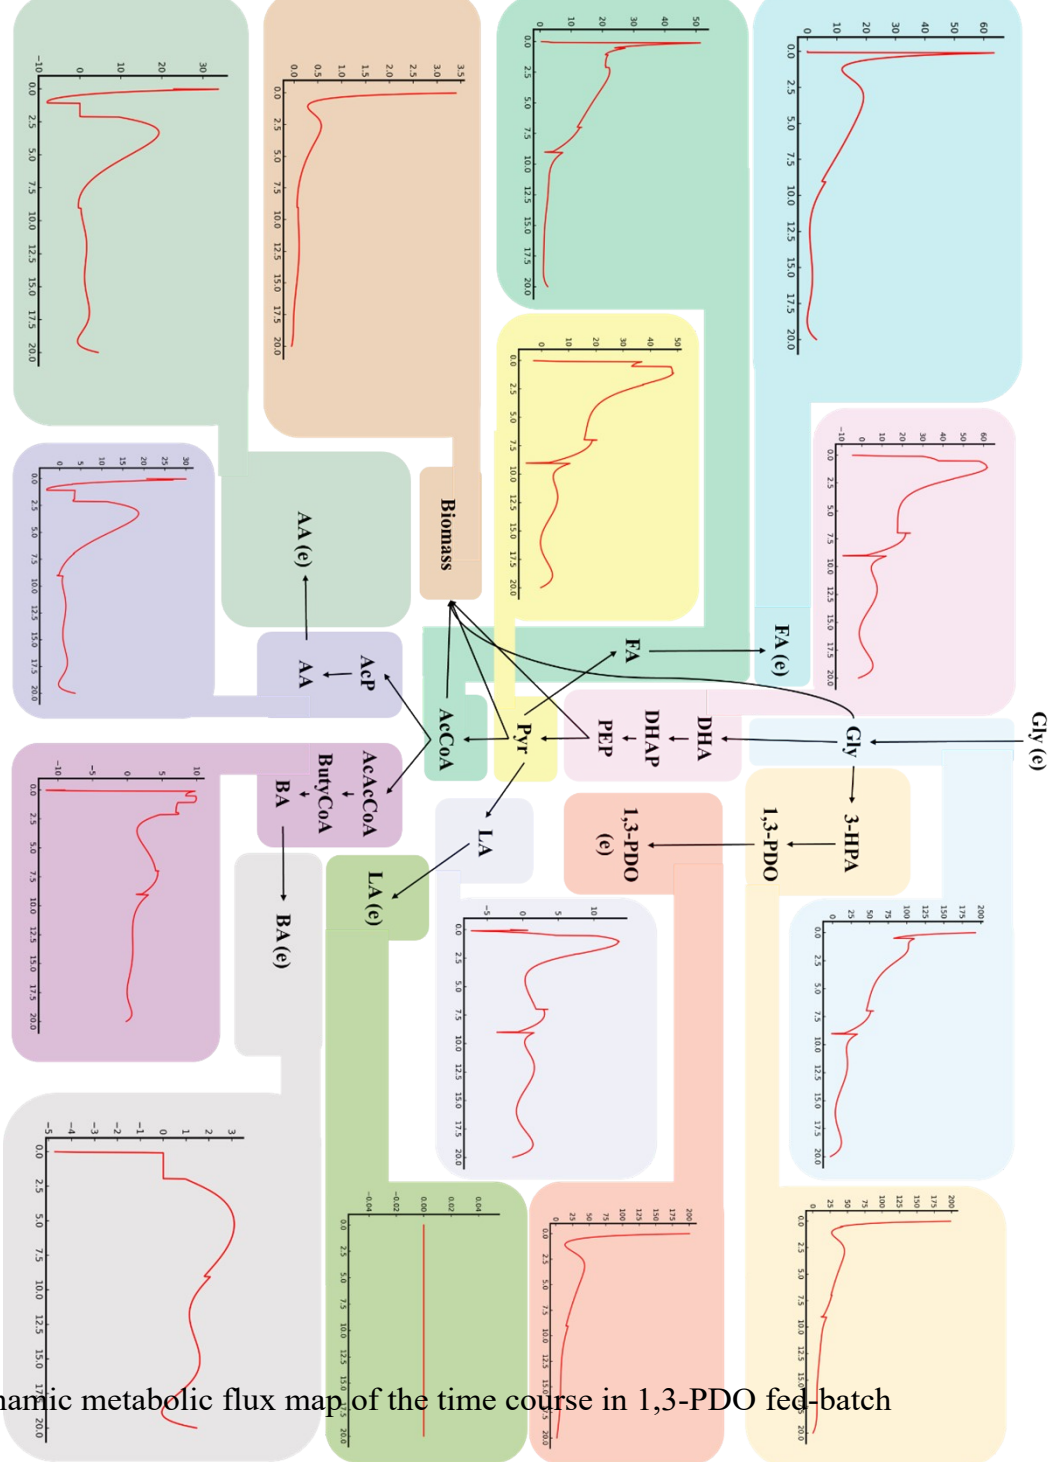

Figure S12. Dynamic metabolic flux map of the time course in 1,3-PDO fed-batch fermentation of G4.

Table S1 The carbon-conserving metabolic model of *C. butyricum* [1-3]. The abbreviations are listed in Table S2

| Rate  | Reaction                                                             |
|-------|----------------------------------------------------------------------|
| $r_1$ | $\text{Gly} + \text{NADH} \rightarrow 1,3\text{-PDO} + \text{NAD}^+$ |
| $r_2$ | $\text{Gly} + 2\text{NAD}^+ \rightarrow \text{PEP} + 2\text{NADH}$   |

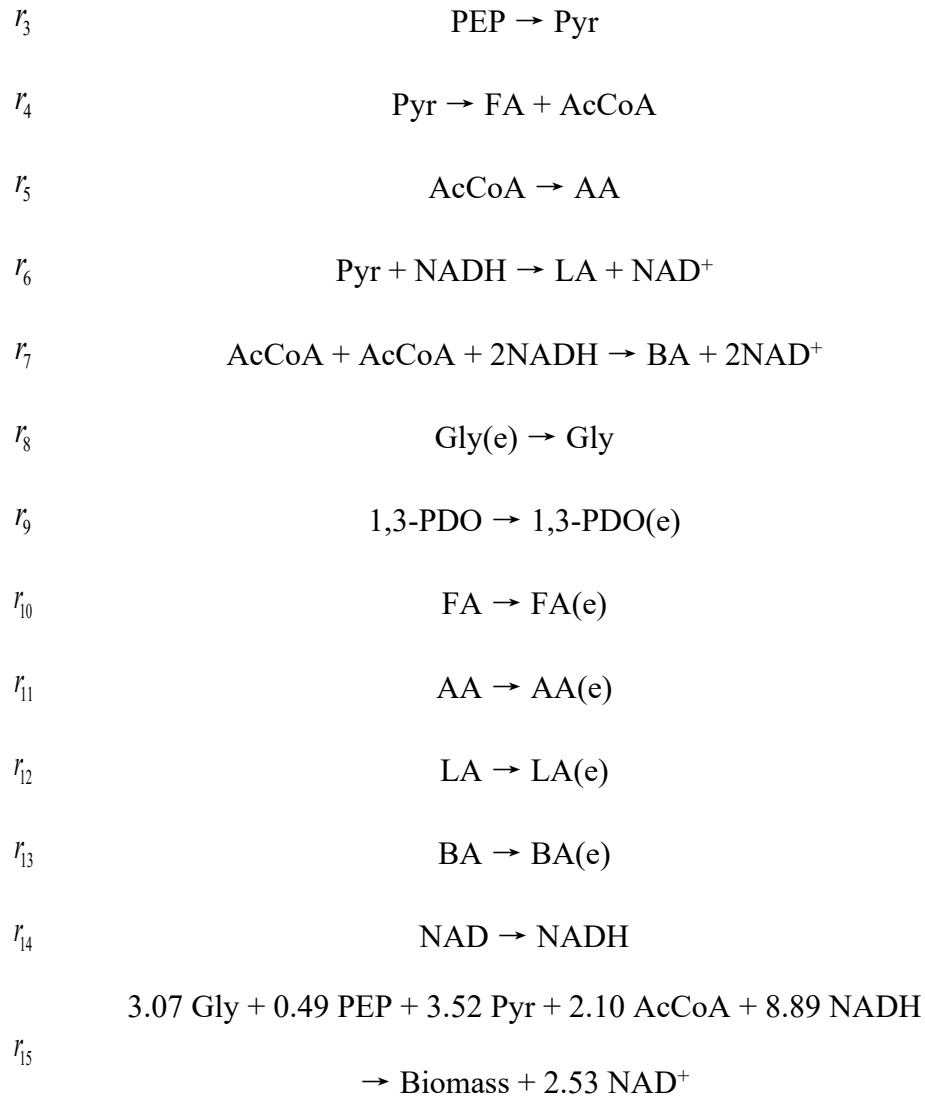

Table S2 The abbreviations of Table S1.

| <b>Abbreviations</b> | <b>Full Name</b>                             |
|----------------------|----------------------------------------------|
| Gly                  | Glycerol                                     |
| NADH                 | Reduced-nicotinamide Adenine<br>Dinucleotide |

|            |                                   |
|------------|-----------------------------------|
| 1,3-PDO    | 1,3-Propanediol                   |
| NAD        | Nicotinamide Adenine Dinucleotide |
| PEP        | Phosphoenolpyruvate               |
| Pyr        | Pyruvic Acid                      |
| FA         | Formic Acid                       |
| AcCoA      | Acetyl-CoA                        |
| AA         | Acetic Acid                       |
| LA         | Lactic Acid                       |
| BA         | Butyric Acid                      |
| Gly(e)     | Glycerol (extracellular)          |
| 1,3-PDO(e) | 1,3-Propanediol (extracellular)   |
| FA(e)      | Formic Acid (extracellular)       |
| AA(e)      | Acetic Acid (extracellular)       |
| LA(e)      | Lactic Acid (extracellular)       |
| BA(e)      | Butyric Acid (extracellular)      |
| Biomass    | Biomass                           |

Table S3 Curve fitting results in Fig S7.

| Goal    | Equation                                                                                   | $R^2$ |
|---------|--------------------------------------------------------------------------------------------|-------|
| Gly (e) | $y = -6.16t + 2.06 \times 10^{-1} t^2 + 2.62 \times 10^{-3} t^3 - 1.39 \times 10^{-4} t^4$ | 0.951 |

|             |                                                                                                                                                          |       |
|-------------|----------------------------------------------------------------------------------------------------------------------------------------------------------|-------|
| 1,3-PDO (e) | $y = 1.32t + 5.21 \times 10^{-1}t^2 - 3.40 \times 10^{-2}t^3 + 4.49 \times 10^{-5}t^5 - 8.53 \times 10^{-7}t^6$                                          | 0.997 |
| OD          | $y = \frac{10.45}{1 + e^{-0.57(t-5.76)}}$                                                                                                                | 0.993 |
| FA (e)      | $y = 1.21 \times 10^{-2}t + 3.22 \times 10^{-1}t^2 - 2.93 \times 10^{-2}t^3 + 1.01 \times 10^{-3}t^4 - 1.23 \times 10^{-5}t^5$                           | 0.980 |
| AA (e)      | $y = \frac{6.50}{1 + e^{-0.95(t-5.81)}}$                                                                                                                 | 0.981 |
| LA (e)      | $y = 0$                                                                                                                                                  | 1.000 |
| BA (e)      | $y = -4.42 \times 10^{-2}t - 9.31 \times 10^{-3}t^2 + 1.32 \times 10^{-2}t^3 - 1.23 \times 10^{-3}t^4 + 4.33 \times 10^{-5}t^5 - 5.35 \times 10^{-7}t^6$ | 0.996 |

Table S4 Curve fitting result in Figure S8.

| Goal | Equation                                                                                                                                                 | $R^2$ |
|------|----------------------------------------------------------------------------------------------------------------------------------------------------------|-------|
| Base | $y = 1.49 \times 10^{-2}t - 1.21 \times 10^{-5}t^3 + 2.03 \times 10^{-10}t^6$                                                                            | 0.992 |
| Feed | $y = \begin{cases} 0 & t \leq 6 \\ 2.81 \times 10^{-2}t - 8.80 \times 10^{-4}t^2 + 1.91 \times 10^{-8}t^5 - 3.12 \times 10^{-13}t^8 & t > 6 \end{cases}$ | 0.993 |

Table S5 Curve fitting result in Figure S9.

| Goal | Equation | $R^2$ |
|------|----------|-------|
|------|----------|-------|

|             |                                                                                                                                                                                                                                                                                                                                                               |       |
|-------------|---------------------------------------------------------------------------------------------------------------------------------------------------------------------------------------------------------------------------------------------------------------------------------------------------------------------------------------------------------------|-------|
| Gly (e)     | $y = \begin{cases} -2.20t + 0.40t^2 - 0.19t^3 + 0.01t^4 & 0 < t \leq 7 \\ 4.87t - 6.67t^2 + 2.30t^3 - 3.73 \times 10^{-1}t^4 + \\ 2.62 \times 10^{-2}t^5 - 6.09 \times 10^{-4}t^6 & 7 < t \leq 9 \\ -2.86 \times 10^3t - 5.47 \times 10^2t^2 - 5.43 \times 10^1t^3 + \\ 2.97t^4 - 8.50 \times 10^{-2}t^5 + 9.94 \times 10^{-4}t^6 & 7 < t \leq 9 \end{cases}$ | 0.993 |
| 1,3-PDO (e) | $y = 1.92t - 1.74t^2 + 7.86 \times 10^{-1}t^3 - 1.26 \times 10^{-1}t^4 + 1.01 \times 10^{-2}t^5 - 4.32 \times 10^{-4}t^6 + 9.46 \times 10^{-6}t^7 - 8.26 \times 10^{-8}t^8$                                                                                                                                                                                   | 0.998 |
| OD          | $y = 9.33 \times 10^{-1}t - 8.70 \times 10^{-1}t^2 + 4.40 \times 10^{-1}t^3 - 9.08 \times 10^{-2}t^4 + 9.54 \times 10^{-3}t^5 - 5.40 \times 10^{-4}t^6 + 1.57 \times 10^{-5}t^7 - 1.84 \times 10^{-7}t^8$                                                                                                                                                     | 0.995 |
| FA (e)      | $y = 5.44 \times 10^{-1}t - 3.59 \times 10^{-1}t^2 + 1.36 \times 10^{-1}t^3 - 1.35 \times 10^{-2}t^4 + 7.92 \times 10^{-7}t^5 + 7.04 \times 10^{-5}t^6 - 3.84 \times 10^{-6}t^7 + 6.39 \times 10^{-8}t^8$                                                                                                                                                     | 0.997 |
| AA (e)      | $y = 2.87 \times 10^{-1}t - 3.34 \times 10^{-1}t^2 - 1.31 \times 10^{-2}t^3 + 1.04 \times 10^{-1}t^4 - 3.45 \times 10^{-2}t^5 + 5.18 \times 10^{-3}t^6 - 4.27 \times 10^{-4}t^7 + 2.01 \times 10^{-5}t^8 - 5.06 \times 10^{-7}t^9 + 5.31 \times 10^{-9}t^{10}$                                                                                                | 0.997 |
| LA (e)      | $y = 0$                                                                                                                                                                                                                                                                                                                                                       | 1.000 |
| BA (e)      | $y = -5.28 \times 10^{-2}t + 6.69 \times 10^{-2}t^2 - 4.58 \times 10^{-2}t^3 + 1.72 \times 10^{-2}t^4 + 2.65 \times 10^{-3}t^5 + 1.97 \times 10^{-4}t^6 - 7.03 \times 10^{-6}t^7 - 9.76 \times 10^{-8}t^8$                                                                                                                                                    | 0.997 |

Table S6 Curve fitting result in Figure S10.

| Goal | Equation                                                                                                                                                | $R^2$ |
|------|---------------------------------------------------------------------------------------------------------------------------------------------------------|-------|
| Base | $y = 2.32 \times 10^{-3}t + 2.09 \times 10^{-3}t^2 - 1.24 \times 10^{-4}t^3 + 2.15 \times 10^{-6}t^4$                                                   | 0.998 |
| Feed | $y = \begin{cases} 0 & t \leq 9 \\ 4.42 \times 10^{-1}t - 4.07 \times 10^{-2}t^2 + 1.78 \times 10^{-3}t^3 - 2.94 \times 10^{-5}t^4 & t > 9 \end{cases}$ | 0.998 |

Table S7 By-products in the different models for fed-batch fermentation

| Model                                    | Glycerol<br>Control | Formic acid<br>(g/L) | Acetic acid<br>(g/L) | Butyric acid<br>(g/L) | Lactic acid<br>(g/L) |
|------------------------------------------|---------------------|----------------------|----------------------|-----------------------|----------------------|
| Constant-speed<br>fed-batch              | 22 mL/h             | 12.53±0.44           | 4.91±0.06            | 7.06±0.00             | 0.39±0.00            |
|                                          | 33 mL/h             | 11.32±0.15           | 4.36±0.10            | 5.50±0.21             | 1.00±0.00            |
|                                          | 44 mL/h             | 10.11±0.06           | 3.69±0.01            | 4.55±0.02             | 1.12±0.12            |
|                                          | 55 mL/h             | 8.26±0.46            | 3.79±0.11            | 3.77±0.08             | 1.50±0.00            |
|                                          | 66 mL/h             | 7.23±0.01            | 2.95±0.00            | 3.72±0.13             | 1.73±0.17            |
| Pulsed fed-batch                         | /                   | 7.89±0.00            | 3.20±0.01            | 3.79±0.01             | 0.43±0.00            |
| Variable-speed<br>fed-batch              | 5 g/L               | 10.24±0.13           | 6.16±0.14            | 6.37±0.24             | 0.29±0.02            |
|                                          | 10 g/L              | 12.78±0.01           | 6.34±0.03            | 8.03±0.04             | 0.35±0.02            |
|                                          | 15 g/L              | 13.84±0.12           | 7.74±0.15            | 8.66±0.30             | 0.21±0.00            |
| Artificial<br>intelligence fed-<br>batch | 5 g/L               | 15.08±0.35           | 7.56±0.34            | 11.90±0.01            | 0.31±0.00            |
|                                          | 10 g/L              | 14.31±0.17           | 7.01±0.01            | 8.97±0.01             | 0.54±0.01            |
|                                          | 15 g/L              | 13.27±0.44           | 6.30±0.20            | 6.31±0.06             | 0.35±0.01            |

Table S8 Parameter comparisons of the different models for fed-batch fermentation

| Model | Glycerol<br>Control | ATP <sup>1</sup><br>(mol) | NADH <sup>2</sup><br>(mol) | Material Cost <sup>3</sup><br>(¥/kg <sub>1,3-PDO</sub> ) | Substrate utilization<br>rate <sup>4</sup> (%) |
|-------|---------------------|---------------------------|----------------------------|----------------------------------------------------------|------------------------------------------------|
|-------|---------------------|---------------------------|----------------------------|----------------------------------------------------------|------------------------------------------------|

|                             |         |      |      |       |        |
|-----------------------------|---------|------|------|-------|--------|
|                             | 22 mL/h | 0.99 | 0.74 | 16.21 | 92.2 % |
|                             | 33 mL/h | 0.87 | 0.65 | 19.66 | 61.1 % |
| Constant-speed<br>fed-batch | 44 mL/h | 0.80 | 0.61 | 20.43 | 62.5 % |
|                             | 55 mL/h | 0.69 | 0.53 | 20.66 | 71.4 % |
|                             | 66 mL/h | 0.72 | 0.55 | 26.64 | 46.7 % |
| Pulsed fed-batch            | /       | 0.56 | 0.42 | 15.73 | 88.7 % |
|                             | 5 g/L   | 1.08 | 0.82 | 14.20 | 80.0 % |
| Variable-speed<br>fed-batch | 10 g/L  | 1.22 | 0.92 | 13.34 | 98.2 % |
|                             | 15 g/L  | 1.45 | 1.10 | 17.77 | 92.8 % |
| Artificial                  | 5 g/L   | 1.68 | 1.25 | 12.43 | 96.6 % |
| intelligence fed-<br>batch  | 10 g/L  | 1.49 | 1.13 | 14.35 | 89.8 % |
|                             | 15 g/L  | 1.03 | 0.77 | 18.67 | 78.0 % |

ATP<sup>1</sup>(mol): ATP produced from glycerol oxidative pathway, =Lactic acid (mol) + Acetic acid (mol)  $\times$  2 + Butyric acid (mol)  $\times$  3

NADH<sup>2</sup> (mol): NADH produced from glycerol oxidative pathway, =Lactic acid (mol) + Acetic acid (mol)  $\times$  2 + Butyric acid (mol)  $\times$  1.5

Medium Cost<sup>3</sup> was calculated based on the unit price for medium component (Table S9)

Substrate utilization rate (%)<sup>4</sup>= (1 - Glycerol remnant (g) / Glycerol total (g))  $\times$  100%

Table S9 Unit price for medium component

| Medium component | Unit price (¥/kg) |
|------------------|-------------------|
|------------------|-------------------|

---

|                                                    |       |
|----------------------------------------------------|-------|
| Crude glycerol                                     | 3.50  |
| Yeast extract                                      | 80.00 |
| (NH <sub>4</sub> ) <sub>2</sub> SO <sub>4</sub>    | 1.80  |
| MgSO <sub>4</sub> •7H <sub>2</sub> O               | 1.60  |
| KH <sub>2</sub> PO <sub>4</sub>                    | 3.30  |
| K <sub>2</sub> HPO <sub>4</sub> •3H <sub>2</sub> O | 8.50  |
| CaCl <sub>2</sub>                                  | 0.85  |
| NaOH                                               | 0.80  |

---

### References

1. Papoutsakis E T. Equations and calculations for fermentations of butyric acid bacteria. *Biotechnology and Bioengineering*, 2000, 67(6): 813-826.
2. Celińska E. Debottlenecking the 1, 3-propanediol pathway by metabolic engineering. *Biotechnology Advances*, 2010, 28(4): 519-530.
3. Cai G, Jin B, Saint C, et al. Metabolic flux analysis of hydrogen production network by *Clostridium butyricum* W5: effect of pH and glucose concentrations. *International Journal of Hydrogen Energy*, 2010, 35(13): 6681-6690.
